# Supplementary material for: Pre-Emptive Antimicrobial Locks Decrease Long-Term Catheter-Related Bloodstream Infections in Hemodialysis Patients
Source: MDPI journal article supplement (doi:10.3390/antibiotics11121692), 2022-11-24
Supplement: s1 [file s1]

# Pre-Emptive Antimicrobial Locks Decrease Long-Term Catheter-Related Bloodstream Infections in Hemodialysis Patients

Andres Blanco-Di Matteo <sup>1</sup>, Nuria Garcia-Fernandez <sup>2</sup>, Aitziber Aguinaga Pérez <sup>3,4</sup>, Francisco Carmona-Torre <sup>1,4</sup>, Amaya C. Oteiza <sup>5</sup>, Jose Leiva <sup>4,5</sup> and Jose Luis Del Pozo <sup>1,4,5,\*</sup>

<sup>1</sup> Infectious Diseases Division, Clinica Universidad de Navarra, 31008 Pamplona, Spain

<sup>2</sup> Nephrology Department, Clinica Universidad de Navarra, 31008 Pamplona, Spain

<sup>3</sup> Clinical Microbiology Department, Hospital Universitario de Navarra, 31008 Pamplona, Spain

<sup>4</sup> Navarra Health Research Institute-IdiSNA, 31008 Pamplona, Spain

<sup>5</sup> Clinical Microbiology Department, Clinica Universidad de Navarra, 31008 Pamplona, Spain

\* Correspondence: jdelpozo@unav.es

**Table S1.** Detailed isolation of quantitative blood cultures.

| Bacteria                                  | N           |
|-------------------------------------------|-------------|
| <i>Staphylococcus epidermidis</i>         | 168         |
| <i>Staphylococcus haemolyticus</i>        | 15          |
| <i>Kocuria kristinae</i>                  | 12          |
| <i>Staphylococcus warneri</i>             | 11          |
| <i>Staphylococcus hominis</i>             | 6           |
| <i>Enterococcus faecalis</i>              | 6           |
| <i>Enterococcus faecium</i>               | 6           |
| <i>Staphylococcus aureus</i>              | 6           |
| <i>Staphylococcus capitis</i>             | 6           |
| <i>Corynebacterium afermentans</i>        | 4           |
| <i>Klebsiella pneumoniae</i>              | 4           |
| <i>Escherichia coli</i>                   | 3           |
| <i>Micrococcus luteus</i>                 | 2           |
| <i>Klebsiella oxytoca</i>                 | 2           |
| <i>Sphingomonas paucimobilis</i>          | 2           |
| <i>Staphylococcus saprophyticus</i>       | 2           |
| <i>Streptococcus bovis</i>                | 2           |
| <i>Bacillus</i> spp                       | 2           |
| <i>Acinetobacter ursingii</i>             | 1           |
| <i>Corynebacterium tuberculostearicum</i> | 1           |
| <i>Corynebacterium urealyticum</i>        | 1           |
| <i>Cutibacterium acnes</i>                | 1           |
| <i>Pseudomonas aeruginosa</i>             | 1           |
| <i>Pseudomonas putida</i>                 | 1           |
| <i>Streptococcus gordonii</i>             | 1           |
| <i>Streptococcus pyogenes</i>             | 1           |
| Negative                                  | 2762        |
| <b>Total</b>                              | <b>3029</b> |
